# Supplementary material
Source: Springer Nature journal article supplement (https://www.springermedizin.de/resource/supplementary/12903_2014_387_MOESM2_ESM.pdf/9516924)

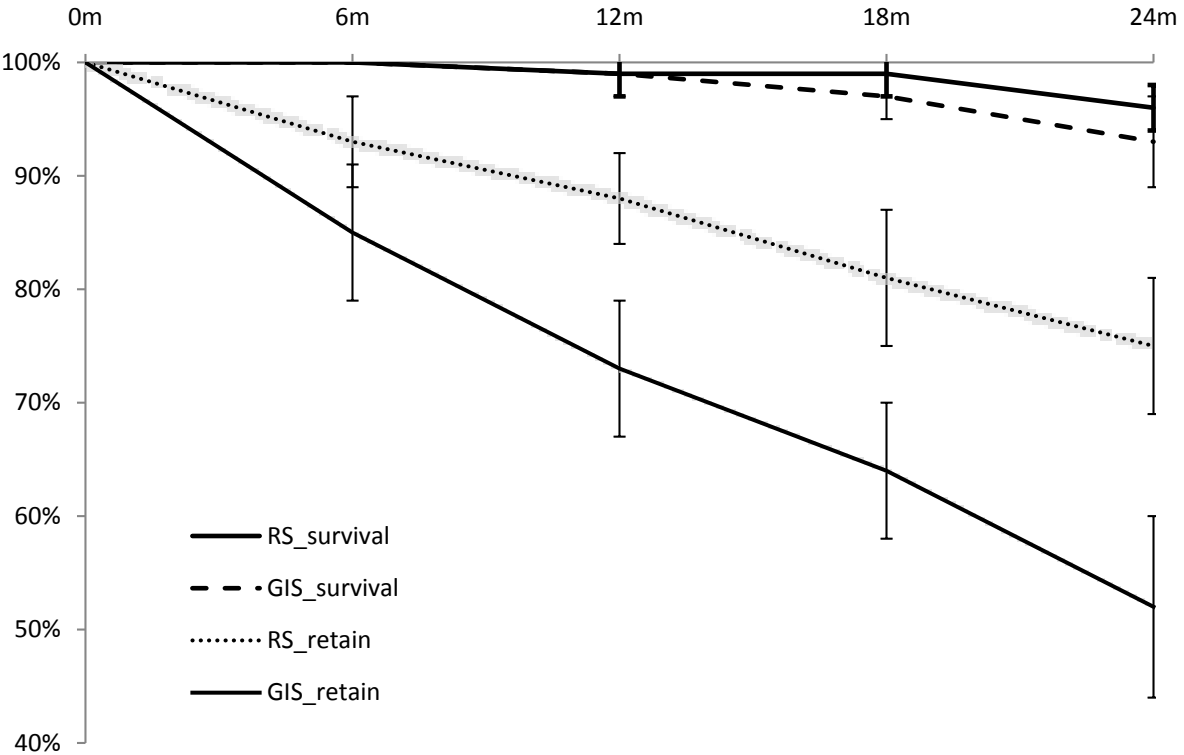

Supplement: MOESM2 [file 9516924]
